# Supplementary material
Source: HighWire-hosted journal article supplement (https://fn.bmjjournals.com/content/suppl/2007/03/13/adc.2006.097170)
Supplement: 922f94webcorrection.pdf [file 922f94webcorrection.pdf]

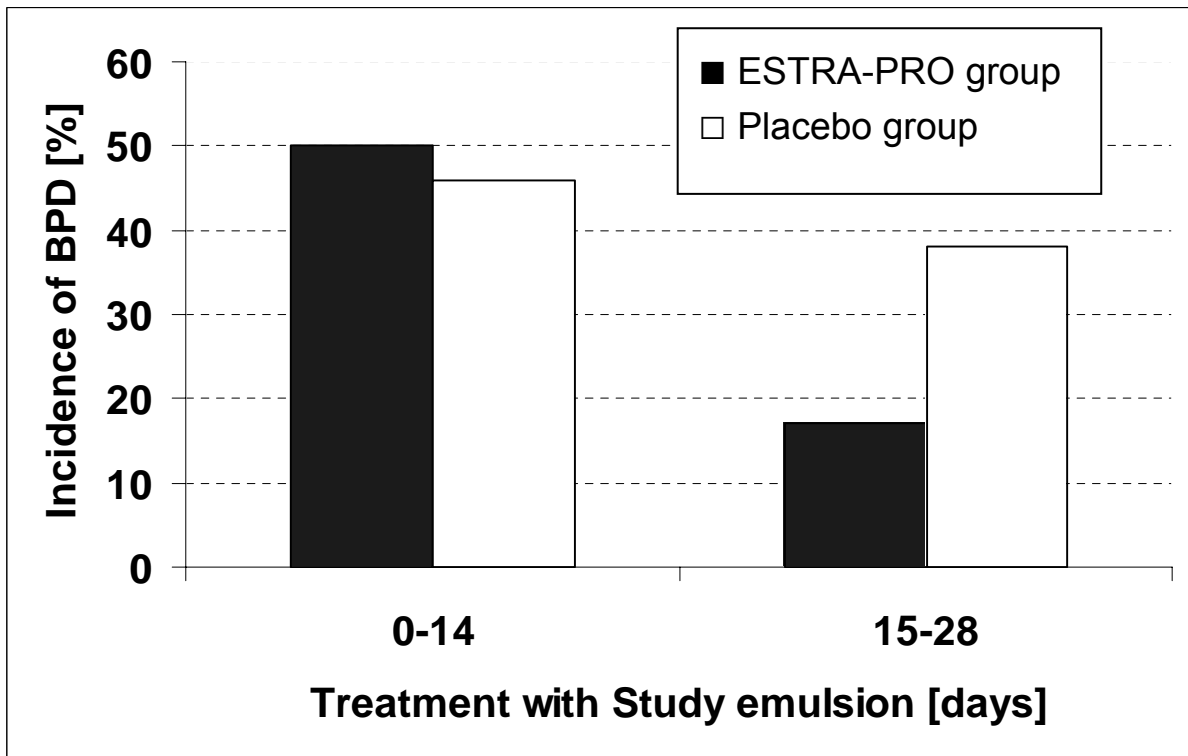

**Figure 2**

Dose-response relationship between the duration of administration of the study emulsion and the incidence of bronchopulmonary dysplasia in percent (ITT population (survivors), filled bars: ESTRA-PRO group, open bars: Placebo group).
